# Supplementary material
Source: MDPI journal article supplement (https://www.mdpi.com/2311-7524/9/5/605)
Supplement: s1 [file s1]

**Supplementary Table S1** Identification of anthocyanins and other phenolic compounds in strawberry cultivars ‘Clery’, ‘Sandra’, ‘Frederica’ and ‘Asia’ and the standards they are expressed as

| Anthocyanin                                    | $\lambda$ [nm] | M <sup>+</sup><br>( <i>m/z</i> ) | MS <sup>2</sup> ( <i>m/z</i> ) | Expressed as                        |  | Group        | Clery | Sandra | Frederica | Asia |
|------------------------------------------------|----------------|----------------------------------|--------------------------------|-------------------------------------|--|--------------|-------|--------|-----------|------|
| cyanidin 3- <i>O</i> - $\beta$ -glucoside      | 530            | 449                              | 287                            | cyanidin-3- <i>O</i> -glucoside     |  | Anthocyanins | x     | x      | x         | x    |
| pelargonidin 3- <i>O</i> - $\beta$ -glucoside  | 530            | 433                              | 271                            | pelargonidin-3- <i>O</i> -glucoside |  | Anthocyanins | x     | x      | x         | x    |
| pelargonidin 3- <i>O</i> - $\beta$ -rutinoside | 530            | 579                              | 271, 433                       | pelargonidin-3- <i>O</i> -glucoside |  | Anthocyanins | x     | x      |           | x    |
| cyanidin-3- <i>O</i> -(6" malonyl) glucoside   | 530            | 535                              | 287                            | cyanidin-3- <i>O</i> -glucoside     |  | Anthocyanins | x     | x      |           |      |
| pelargonidin-3-(6" malonyl) glucoside          | 530            | 519                              | 271, 475, 433                  | pelargonidin-3- <i>O</i> -glucoside |  | Anthocyanins | x     | x      | x         | x    |
| pelargonidin-3- <i>O</i> -acetylglucoside      | 530            | 475                              | 271                            | pelargonidin-3- <i>O</i> -glucoside |  | Anthocyanins | x     | x      | x         | x    |

  

| Phenolic compound                               | $\lambda$ [nm] | [M- H] <sup>-</sup><br>( <i>m/z</i> ) | MS <sup>2</sup> ( <i>m/z</i> ) | MS <sup>3</sup> ( <i>m/z</i> ) | MS <sup>4</sup> ( <i>m/z</i> ) | Expressed as             | Group                     | Clery | Sandra | Frederica | Asia |
|-------------------------------------------------|----------------|---------------------------------------|--------------------------------|--------------------------------|--------------------------------|--------------------------|---------------------------|-------|--------|-----------|------|
| procyanidin dimer                               | 350            | 577                                   | 425, 407, 451, 289             |                                |                                | procyanidin B1           | Flavanol                  | x     | x      | x         | x    |
| procyanidin trimer                              | 280            | 865                                   | 577, 407, 405, 287             |                                |                                | procyanidin B1           | Flavanol                  | x     | x      |           | x    |
| HHDP-galloylglucose                             | 280            | 633                                   | 301, 494, 463, 226             |                                |                                | ellagic acid             | Hydroxybenzoic acid der.  |       |        | x         |      |
| <i>p</i> -coumaric hexoside                     | 280, 350       | 325                                   | 163, 145, 119                  |                                |                                | <i>p</i> -coumaric acid  | Hydroxycinnamic acid der. | x     | x      | x         | x    |
| <i>p</i> -coumaric hexoside der.                | 280, 350       | 361                                   | 325                            | 163, 145, 119                  |                                | <i>p</i> -coumaric acid  | Hydroxycinnamic acid der. | x     | x      | x         | x    |
| ferulic acid hexoside                           | 350            | 355                                   | 193, 217, 175                  |                                |                                | ferulic acid             | Hydroxycinnamic acid der. | x     |        | x         |      |
| apigenin- <i>O</i> -rhamnoside                  | 350            | 461                                   | 415                            | 269, 161                       |                                | apigenin-7-glucoside     | Flavonols                 | x     | x      |           | x    |
| apigenin- <i>O</i> -glucoside der.              | 280, 350       | 555                                   | 519, 431                       | 269                            |                                | apigenin-7-glucoside     | Flavonols                 |       | x      |           | x    |
| apigenin der.                                   | 280, 350       | 473                                   | 269                            |                                |                                | apigenin-7-glucoside     | Flavonols                 |       |        | x         |      |
| brevifolin carboxylic acid                      | 280, 350       | 291                                   | 247                            | 219, 191, 203, 175             | 191                            | ellagic acid             | Hydroxybenzoic acid der.  | x     | x      |           |      |
| caffeic acid der.                               | 280            | 581                                   | 563, 383, 401                  | 223, 179, 365, 159             | 179, 135                       | caffeic acid             | Hydroxycinnamic acid der. | x     |        |           |      |
| caffeic acid der.                               | 280            | 438                                   | 306, 288                       | 254, 272, 287, 179             | 179, 135                       | caffeic acid             | Hydroxycinnamic acid der. | x     |        |           |      |
| apigenin- <i>O</i> -glucoside                   | 280, 350       | 431                                   | 269                            |                                |                                | apigenin-7-glucoside     | Flavonols                 | x     |        | x         |      |
| ellagic acid der.                               | 280            | 463                                   | 301, 300, 257                  |                                |                                | ellagic acid             | Hydroxybenzoic acid der.  |       | x      | x         |      |
| ferulic acid hexoside der.                      | 280, 350       | 449                                   | 355, 269, 193                  |                                |                                | ferulic acid             | Hydroxycinnamic acid der. | x     | x      | x         | x    |
| ellagic acid der.                               | 280            | 479                                   | 301, 300, 433                  | 257, 229, 185                  |                                | ellagic acid             | Hydroxybenzoic acid der.  | x     |        | x         | x    |
| ellagic acid- <i>O</i> -deoxyhexoside           | 280, 350       | 447                                   | 301, 300                       | 257, 229                       |                                | ellagic acid             | Hydroxybenzoic acid der.  |       | x      | x         |      |
| morin                                           | 280            | 303                                   | 271, 163, 227                  | 163, 203, 227                  | 135, 134                       | apigenin-7-glucoside     | Flavonols                 |       | x      |           |      |
| apigenin der.                                   | 280            | 501                                   | 269                            |                                |                                | apigenin-7-glucoside     | Flavonols                 |       |        |           | x    |
| tormentic acid                                  | 280            | 487                                   | 441, 339, 293                  | 293, 149, 147                  | 191, 101                       |                          | not phenolic compound     | x     | x      | x         | x    |
| caffeic acid der.                               | 350            | 475                                   | 267, 429                       | 197, 135, 111, 179             |                                | caffeic acid             | Hydroxycinnamic acid der. | x     |        |           |      |
| cinnamic acid-3- <i>O</i> -hexoside             | 280, 350       | 355                                   | 309, 147, 207, 248             |                                |                                | caffeic acid             | Hydroxycinnamic acid der. |       |        | x         | x    |
| kaempferol-3-coumaroylhexoside                  | 350            | 593                                   | 447, 285, 257, 229             |                                |                                | kaempferol-3-glucoside   | Flavonols                 | x     |        |           | x    |
| caffeic acid der.                               | 280            | 403                                   | 358, 305, 385                  |                                |                                | caffeic acid             | Hydroxycinnamic acid der. |       | x      | x         | x    |
| quercetin-3- <i>O</i> - $\beta$ -glucuronide    | 280, 350       | 477                                   | 301                            | 179, 151                       |                                | quercetin-3-glucoside    | Flavonols                 | x     | x      | x         | x    |
| ellagic acid der.                               | 280, 350       | 505                                   | 301, 300, 343, 445             |                                |                                | ellagic acid             | Hydroxybenzoic acid der.  |       |        | x         |      |
| kaempferol- <i>O</i> -hexoside                  | 350            | 447                                   | 284, 285                       |                                |                                | kaempferol-3-glucoside   | Flavonols                 | x     | x      | x         | x    |
| kaempferol-3- <i>O</i> - $\beta$ -glucuronide   | 280, 350       | 461                                   | 285                            | 257, 267, 241                  |                                | kaempferol-3-glucoside   | Flavonols                 | x     | x      | x         | x    |
| isorhamnetin-3- <i>O</i> - $\beta$ -glucuronide | 350            | 491                                   | 315                            | 300                            |                                | isorhamnetin-3-glucoside | Flavonols                 | x     | x      |           | x    |
| isorhamnetin- <i>O</i> -hexoside der.           | 350            | 477                                   | 315, 379                       |                                |                                | isorhamnetin-3-glucoside | Flavonols                 |       |        | x         |      |
| caffeoylglucaric isomer der.                    | 280            | 417                                   | 223, 179, 383                  | 179, 135                       |                                | caffeic acid             | Hydroxycinnamic acid der. | x     | x      | x         |      |
| ellagic acid der.                               | 280, 350       | 533                                   | 300, 301                       | 283, 239, 229                  |                                | ellagic acid             | Hydroxybenzoic acid der.  | x     | x      |           |      |
| kaempferol-malonylglucoside                     | 350            | 489                                   | 284, 285                       | 255, 257                       |                                | kaempferol-3-glucoside   | Flavonols                 |       |        | x         | x    |

der., derivative; [M-H]<sup>-</sup>, pseudo-molecular ion identified in negative ion mode; M<sup>+</sup>, pseudo-molecular ion identified in positive ion mode ion.
